# Supplementary material for: Surprising sex differences indicate davunetide-mediated brain protection and clinical efficacy in women suffering from progressive supranuclear palsy
Source: Research Square preprint supplement (doi:10.21203/rs.3.rs-2457393/v1), 2023-02-02
Supplement: Supplementary file 1 [file c0626bcc14a8c4fe4291d703.xlsx]

## Sheet: deconstructed_scale_timeseries
coefficient	parameter	timepoint	Estimate	Std. Error	t value	pvalue
age:davunetide	total_raw	week_26	-0.0122103	0.00419644	-2.90968	0.00410219
davunetide	total_raw	week_26	0.816744	0.283807	2.87782	0.00451844
age:davunetide	total_raw	week_52	-0.0176278	0.00648659	-2.71757	0.00732007
age:female:davunetide	total_raw	week_52	0.0256541	0.00954047	2.68897	0.00794654
davunetide	total_raw	week_52	1.16724	0.440769	2.64819	0.00892407
female:davunetide	total_raw	week_52	-1.65626	0.650663	-2.5455	0.0118821
age:female:davunetide	delayed_memory	week_26	0.019297	0.00776386	2.4855	0.013898
female:davunetide	delayed_memory	week_26	-1.29083	0.527802	-2.44568	0.0154713
female	delayed_memory	week_26	0.879238	0.36402	2.41536	0.0167733
age	delayed_memory	week_26	0.00886226	0.00370508	2.39192	0.0178454
age:female	delayed_memory	week_26	-0.0121346	0.00538311	-2.25421	0.0254527
age:female:davunetide	total_scale	week_52	0.0138034	0.00614937	2.24469	0.0261943
age:davunetide	delayed_memory	week_26	-0.0121541	0.00545009	-2.23007	0.0270439
female	total_raw	week_52	1.01571	0.459252	2.21166	0.0284442
davunetide	delayed_memory	week_26	0.809363	0.369228	2.19204	0.0297276
age:female	total_raw	week_52	-0.0148194	0.00677257	-2.18815	0.0301458
female	total_scale	week_52	0.646976	0.296014	2.18563	0.0303338
age:female	total_scale	week_52	-0.00936317	0.0043653	-2.14491	0.0335082
age	visuospatial_or_constructional	week_26	0.00605978	0.00283125	2.14032	0.0337137
female:davunetide	total_scale	week_52	-0.889854	0.419388	-2.12179	0.0354352
davunetide	total_scale	week_26	0.421168	0.205632	2.04816	0.0420824
age:female:davunetide	total_raw	week_26	0.0120335	0.0059131	2.03505	0.0433986
age:davunetide	total_scale	week_26	-0.00618369	0.00304053	-2.03376	0.0435308
female:davunetide	total_raw	week_26	-0.788721	0.402167	-1.96118	0.0514919
female	immediate_memory	week_26	0.672501	0.355302	1.89276	0.0600409
age:female:davunetide	immediate_memory	week_26	0.0140847	0.00759853	1.85361	0.0654781
female:davunetide	immediate_memory	week_26	-0.949978	0.51663	-1.8388	0.0676398
age	total_raw	week_26	0.00513896	0.00279611	1.8379	0.0678231
age:female	immediate_memory	week_26	-0.00966094	0.0052616	-1.83612	0.0680363
age	immediate_memory	week_26	0.00657569	0.00363886	1.80707	0.0724685
age:female:davunetide	total_scale	week_26	0.00766033	0.00428433	1.78799	0.0755595
age:female:davunetide	language	week_52	0.0145526	0.00817441	1.78026	0.076908
female:davunetide	total_scale	week_26	-0.516619	0.29139	-1.77295	0.0780285
age:davunetide	language	week_52	-0.0104262	0.00590879	-1.76453	0.0795273
age	total_raw	week_52	0.0073337	0.00423784	1.73053	0.0855136
age	total_scale	week_26	0.00345423	0.00202592	1.70502	0.0900175
davunetide	language	week_52	0.656199	0.40144	1.63462	0.104071
davunetide	immediate_memory	week_26	0.593774	0.363914	1.63163	0.104555
age:davunetide	total_scale	week_52	-0.00671735	0.00418097	-1.60665	0.110154
age:davunetide	immediate_memory	week_26	-0.00851974	0.00537586	-1.58481	0.114814
age:davunetide	visuospatial_or_constructional	week_26	-0.00655969	0.00418274	-1.56828	0.118623
davunetide	total_scale	week_52	0.439272	0.2841	1.54619	0.124086
female:davunetide	language	week_52	-0.861265	0.55756	-1.5447	0.124369
age:female:davunetide	delayed_memory	week_52	0.0142089	0.0092544	1.53537	0.126693
davunetide	visuospatial_or_constructional	week_26	0.423654	0.283147	1.49624	0.136393
female:davunetide	delayed_memory	week_52	-0.929668	0.631944	-1.47112	0.143247
female:davunetide	attention	week_52	-0.748908	0.520129	-1.43985	0.151863
davunetide	attention	week_52	0.522556	0.371718	1.40579	0.161727
female	delayed_memory	week_52	0.608008	0.440391	1.38061	0.169349
female	total_scale	week_26	0.272357	0.201183	1.35378	0.177603
age:davunetide	attention	week_52	-0.00730198	0.00547132	-1.33459	0.183906
age	total_scale	week_52	0.00360249	0.00273152	1.31886	0.18915
age:female:davunetide	attention	week_52	0.0100508	0.00763399	1.31659	0.189858
age:female	total_scale	week_26	-0.0038314	0.00297054	-1.2898	0.198872
age:female	delayed_memory	week_52	-0.00826743	0.00648135	-1.27557	0.203979
age	visuospatial_or_constructional	week_52	0.00377093	0.00303418	1.24282	0.215731
female	total_raw	week_26	0.296554	0.277666	1.06803	0.287023
age:female	total_raw	week_26	-0.00426293	0.00409984	-1.03978	0.299919
female:davunetide	visuospatial_or_constructional	week_52	0.447174	0.438278	1.0203	0.309109
davunetide	attention	week_26	0.359089	0.362295	0.991153	0.32302
age:female	attention	week_26	0.00498019	0.00523366	0.951568	0.342667
female	attention	week_26	-0.32647	0.354455	-0.921048	0.358331
age:davunetide	delayed_memory	week_52	-0.00567414	0.0063791	-0.88949	0.375092
female	attention	week_52	0.307544	0.349145	0.880849	0.379721
age:davunetide	visuospatial_or_constructional	week_52	-0.00406052	0.00464469	-0.874228	0.383288
davunetide	delayed_memory	week_52	0.37269	0.433464	0.859794	0.391205
age:davunetide	attention	week_26	-0.00458616	0.00535697	-0.85611	0.393142
age:female:davunetide	visuospatial_or_constructional	week_52	-0.00544675	0.00642562	-0.847662	0.397877
age:female	attention	week_52	-0.00410054	0.00517533	-0.792324	0.429345
age:female:davunetide	language	week_26	0.00482049	0.00648226	0.743644	0.458089
davunetide	visuospatial_or_constructional	week_52	0.223533	0.315558	0.708374	0.479731
female:davunetide	language	week_26	-0.304709	0.440734	-0.691367	0.490251
age	delayed_memory	week_52	0.00265224	0.00416761	0.636394	0.525441
age	language	week_26	-0.00192993	0.0031043	-0.621696	0.534951
age:female	language	week_52	-0.00337837	0.00548715	-0.615687	0.538965
age:female	visuospatial_or_constructional	week_26	0.00251001	0.00409383	0.613118	0.540594
age:female	language	week_26	-0.00262529	0.00448864	-0.584873	0.559386
age:female:davunetide	visuospatial_or_constructional	week_26	-0.00338102	0.0059121	-0.57188	0.568137
female:davunetide	visuospatial_or_constructional	week_26	0.228785	0.401969	0.569161	0.569976
female	language	week_26	0.171043	0.303106	0.5643	0.573273
female	visuospatial_or_constructional	week_26	-0.150398	0.276446	-0.544042	0.587105
age	immediate_memory	week_52	-0.00211026	0.00428103	-0.492932	0.622728
female	language	week_52	0.18128	0.370876	0.488789	0.625652
davunetide	language	week_26	0.128531	0.310453	0.414012	0.679373
age:female:davunetide	immediate_memory	week_52	0.00368452	0.00911564	0.404197	0.686601
age:davunetide	language	week_26	-0.00181278	0.00458612	-0.395276	0.69312
age	language	week_52	0.00149058	0.00385996	0.386166	0.69988
female	visuospatial_or_constructional	week_52	-0.109959	0.291532	-0.377175	0.706537
female:davunetide	immediate_memory	week_52	-0.218865	0.621296	-0.352272	0.725092
age:female	visuospatial_or_constructional	week_52	0.00151318	0.00431326	0.350821	0.726179
age:davunetide	immediate_memory	week_52	-0.00191188	0.00655336	-0.291741	0.770858
davunetide	immediate_memory	week_52	0.127859	0.445232	0.287174	0.774346
age:female	immediate_memory	week_52	0.00129873	0.00608567	0.213408	0.831277
female	immediate_memory	week_52	-0.0836844	0.411328	-0.203449	0.839039
age	attention	week_26	-0.00065626	0.00356938	-0.183858	0.854344
female:davunetide	attention	week_26	-0.0535905	0.513388	-0.104386	0.916986
age:female:davunetide	attention	week_26	-0.000185973	0.00754838	-0.0246375	0.980373
age	attention	week_52	4.67957e-05	0.00357418	0.0130927	0.98957
